# Supplementary material
Source: publisher site journal article supplement (https://www.spandidos-publications.com/3676/downloadSupplementary)
Supplement: Supplementary file 1 [file downloadSupplementary]

## Sheet: Foglio1
Table SI. List of differentially deregulated genes targeted by tomentosin in RPMI-8226 cell line.
Gene	Mean_parsed_raw_counts	Mean_parsed_raw_counts_MLE	LFC	LFC MLE	LFC MLE shrinked	lfcSE	Wald test	Wald test P-value	Adjusted P-value FDR	NC untreated			NC treated
										1	2	3	1	2	3
HMOX1	263962	274563	5.53532	5.53499	5.53129	0.102874	53.8034	3.44442e-57	3.44442e-57	13.5347	13.7424	13.2006	18.8326	19.2027	19.0484
HSPA1A	1592	1656.67	3.34205	3.3332	3.3078	0.204805	16.275	1.48466e-59	3.44442e-57	8.17885	7.75682	8.62205	11.1077	11.7655	11.7106
HSPA1B	36938	38121.5	2.81705	2.8168	2.80724	0.0999992	28.1682	1.4354e-174	8.88036e-172	13.1665	13.1286	13.3066	15.7908	16.2113	16.0509
AKR1C3	5092	5213.76	2.66622	2.66599	2.65639	0.116046	22.9736	8.56779e-117	3.97546e-114	10.481	10.6628	10.2645	13.1643	13.1357	13.107
IGF2	254.167	278.433	2.32451	2.38729	1.96694	0.570859	4.18193	2.89049e-05	0.000323177	5.22931	3.99128	6.04701	5.27962	6.48728	10.4742
SLC7A11	2972.83	3047.75	1.84521	1.84477	1.82031	0.151973	12.1388	6.57774e-34	1.10984e-31	10.4648	10.2643	10.353	11.9341	12.4681	12.2156
GCLM	870.333	892.414	1.80454	1.79275	1.71333	0.260519	6.88147	5.92384e-12	2.33929e-10	8.64885	7.87881	9.22132	9.92622	10.5427	10.6937
SQSTM1	71589.8	73072.3	1.68147	1.68144	1.6715	0.0847958	19.8293	1.66469e-87	6.17932e-85	15.0802	15.1905	14.9751	16.6572	16.831	16.802
NQO1	19531.3	20032.3	1.62743	1.62739	1.61407	0.095102	17.1121	1.20592e-65	3.19741e-63	13.0351	13.4955	13.2098	14.6217	14.9749	15.026
BAG3	9276.33	9433.61	1.62359	1.62271	1.60548	0.120638	13.4511	3.03211e-41	5.6276e-39	12.2037	11.9439	12.3603	13.6797	13.9273	13.7717
FOXE1	212.167	217.587	1.62116	1.57727	1.20605	0.468871	3.36396	0.000768319	0.00572691	6.71474	5.47671	7.61873	7.44189	8.54687	8.68489
DNAJB2	1840	1875.61	1.53767	1.53767	1.51219	0.144194	10.6639	1.50091e-26	1.98977e-24	9.86012	10.0107	9.83875	11.3146	11.6275	11.3805
FTH1	1.94175e+06	1.98434e+06	1.53453	1.53472	1.52229	0.100558	15.262	1.36902e-52	2.82323e-50	19.7584	20.3264	19.7632	21.3629	21.5631	21.5257
DNAJB1	72550	73982.4	1.5254	1.52539	1.51637	0.0777547	19.618	1.08589e-85	3.35901e-83	15.0346	15.3564	15.2536	16.6053	16.864	16.7515
ABHD2	11448.7	11536.8	1.33926	1.33709	1.30847	0.141273	9.4646	2.94674e-21	2.8785e-19	13.0236	12.2249	12.7337	14.0395	14.1122	13.8483
NUPR1	820.167	842.991	1.30484	1.30626	1.24072	0.207088	6.30776	2.83094e-10	8.34005e-09	8.65558	9.02397	8.98647	9.66373	10.5099	10.4069
TXNRD1	7722.33	7846.92	1.25146	1.25132	1.23404	0.108066	11.5792	5.25248e-31	8.12384e-29	12.2177	12.2618	12.0553	13.3413	13.4187	13.5292
HSPH1	2348.67	2385.26	1.23862	1.23842	1.20975	0.136187	9.0935	9.59023e-20	8.09067e-18	10.2922	10.7417	10.361	11.66	11.8423	11.6084
HAND1	1024.67	1054.83	1.18907	1.18693	1.04373	0.280012	4.23886	2.24662e-05	0.000255812	9.14817	8.58424	9.8487	9.38515	10.7579	11.0053
SNAI1	229	231.495	1.14749	1.14111	0.828256	0.386729	2.95066	0.00317098	0.0185062	7.45428	6.77089	7.21473	8.14469	8.63972	8.09797
SLC3A2	13695.2	13891.7	1.09645	1.09645	1.07553	0.102969	10.6484	1.77458e-26	2.19575e-24	13.1819	13.059	13.0839	14.0443	14.3346	14.2352
DDIT3	479.833	485.172	1.04919	1.04342	0.87086	0.293238	3.55827	0.000373299	0.00311574	8.52943	7.82586	8.49743	9.08943	9.56963	9.34124
EGR1	1277.83	1298.93	1.0197	1.02292	0.964776	0.180417	5.66974	1.43018e-08	2.98249e-07	9.56559	9.12056	10.1712	10.4872	9.91476	11.5145
PIR	1499.33	1529.01	1.00422	1.00447	0.961688	0.154684	6.4937	8.37547e-11	2.77587e-09	9.72116	10.1652	10.0358	10.643	11.1763	11.1155
CSF2	441.167	440.835	0.977431	0.981175	0.746001	0.322901	3.03863	0.00237658	0.0145096	7.95178	7.84594	8.74897	9.29457	9.35065	8.83376
SERPINH1	12671	12810.4	0.955479	0.955375	0.933809	0.096167	9.93455	2.9451e-23	3.21535e-21	13.1141	13.0201	13.1292	13.9342	14.13	14.0657
CELSR2	280.833	287.566	0.953956	0.954065	0.644579	0.356472	2.67641	0.00744162	0.0367331	7.43094	7.47671	7.7337	7.80617	9.11787	8.57918
DISP1	629.667	633.862	0.939461	0.927664	0.738809	0.288569	3.21471	0.00130578	0.00891	8.95723	7.96703	9.24089	9.38316	9.79699	9.80338
CENPN	344	346.98	0.935492	0.933671	0.710435	0.314107	2.97246	0.00295427	0.0176306	8.28242	7.60009	7.77007	8.71067	8.93242	8.81597
TLR6	6142.5	6238.48	0.914375	0.914258	0.893073	0.106447	8.58886	8.78366e-18	6.27019e-16	11.9535	12.3222	11.937	12.8177	13.1313	13.0068
HSPA8	890542	904517	0.903937	0.903977	0.887898	0.0857834	10.5379	5.777e-26	6.70131e-24	19.0499	19.5498	19.1698	20.0005	20.279	20.2017
P4HA1	3799.33	3849.45	0.90226	0.902146	0.878284	0.120616	7.47946	7.4628e-14	3.84749e-12	11.29	11.6211	11.2457	12.2098	12.3539	12.2999
JMJD6	4079.5	4114.41	0.898908	0.898509	0.870878	0.1215	7.39514	1.41256e-13	6.72232e-12	11.578	11.3482	11.5323	12.3149	12.4563	12.3841
DDB2	819.333	829.387	0.882847	0.882696	0.796567	0.202748	4.35367	1.33877e-05	0.000156274	9.245	9.21109	9.0932	9.91383	10.2492	10.0348
AKT1S1	10310.3	10414.3	0.882478	0.882426	0.864764	0.0946114	9.32685	1.09063e-20	1.0121e-18	12.8639	12.8488	12.7982	13.6454	13.8321	13.681
HSPA4L	2398.33	2422.85	0.855188	0.855221	0.820965	0.130016	6.57782	4.77408e-11	1.64087e-09	10.6879	10.8788	10.679	11.5571	11.7575	11.4967
MRE11A	2517.17	2551.93	0.854432	0.854394	0.807731	0.15039	5.68117	1.33774e-08	2.82142e-07	10.8659	10.7568	10.8309	11.3971	11.9058	11.714
EAF2	2142	2181.14	0.854427	0.854169	0.811643	0.143429	5.95535	2.59518e-09	6.33769e-08	10.3503	10.9354	10.471	11.1802	11.6176	11.5222
GSR	17429	17648.9	0.836122	0.836145	0.821441	0.0862166	9.69818	3.06917e-22	3.16466e-20	13.514	13.691	13.6716	14.2964	14.5081	14.5805
CYCS	940.167	952.692	0.834216	0.834124	0.758114	0.18813	4.43377	9.26007e-06	0.000112331	9.17417	9.50645	9.54543	10.0192	10.4621	10.2475
FOSL1	1075.33	1085.64	0.830489	0.83083	0.764997	0.176783	4.69971	2.6053e-06	3.58181e-05	9.52393	9.54791	9.7383	10.361	10.2884	10.6522
HSPB1	5388.17	5462.04	0.826384	0.82617	0.79737	0.11797	7.00325	2.50089e-12	1.07945e-10	11.7685	11.8881	12.1339	12.4503	12.9685	12.8509
LY96	6893.67	6985.97	0.82561	0.825663	0.806484	0.100676	8.2012	2.37992e-16	1.47238e-14	12.1864	12.3509	12.343	12.9038	13.2386	13.2147
CD24	1217.67	1212.03	0.823521	0.816036	0.696757	0.226402	3.60437	0.000312909	0.00272657	10.066	8.92674	10.2103	10.6588	10.4698	10.545
DDIT4	12018.3	12214.3	0.819653	0.820474	0.785979	0.127766	6.42171	1.34753e-10	4.23901e-09	13.1495	13.0162	13.1128	13.5261	14.098	14.1134
ID1	8946	9068.5	0.809615	0.809608	0.789332	0.0992732	8.15535	3.48161e-16	2.08447e-14	12.5508	12.852	12.6392	13.3226	13.5529	13.5953
TMEM116	3275.5	3312.31	0.806317	0.806259	0.769784	0.131265	6.14223	8.13725e-10	2.15753e-08	11.1636	11.46	11.0697	12.0046	12.0292	12.0783
LAMTOR3	1674.83	1681.6	0.790044	0.784381	0.680646	0.209989	3.73534	0.000187459	0.00174836	10.5221	9.68987	10.5225	10.876	11.207	11.0216
PMAIP1	3656.17	3718.83	0.78337	0.784076	0.738041	0.143884	5.44936	5.05521e-08	9.0216e-07	11.4216	11.4397	11.3415	11.8028	12.369	12.3811
ATF4	6611.33	6682.16	0.771567	0.771463	0.749621	0.113081	6.82223	8.96385e-12	3.39529e-10	12.2712	12.1441	12.3746	12.8219	13.1205	13.1622
LRMP	5173.83	5253.22	0.767515	0.767297	0.742581	0.106744	7.18818	6.5662e-13	2.90163e-11	11.5598	12.1896	11.9768	12.4284	12.8794	12.7209
MAP1B	872.333	877.83	0.736211	0.736014	0.646673	0.193414	3.80538	0.000141589	0.0013831	9.41914	9.14778	9.49923	10.0358	9.94197	10.297
PRKACB	17058.8	17239.5	0.730608	0.730669	0.708718	0.09781	7.47029	8.00186e-14	4.0139e-12	13.5116	13.8983	13.5648	14.3415	14.4144	14.4105
ATG13	2851	2867.74	0.728709	0.728314	0.687892	0.133226	5.46676	4.58337e-08	8.33993e-07	11.1156	10.9571	11.1484	11.7526	11.9087	11.7458
NPM1	893.167	907.702	0.723121	0.724123	0.61631	0.210273	3.44373	0.000573753	0.00445559	9.33155	9.29384	9.55936	9.65051	10.2884	10.4152
TMEM57	12160.8	12252.1	0.713429	0.713349	0.693982	0.0942528	7.56847	3.77658e-14	2.12404e-12	13.2132	13.1159	13.2088	13.8081	13.9533	13.9167
DNAJA1	94766.3	95732.7	0.709239	0.70922	0.696994	0.0843492	8.40813	4.16587e-17	2.76137e-15	16.0977	16.3195	16.0215	16.7853	16.9101	16.8711
CDC14B	4023	4055.13	0.708696	0.708594	0.678601	0.114851	6.16967	6.84338e-10	1.89575e-08	11.6497	11.6245	11.4874	12.252	12.326	12.3098
ADAM17	4953.33	5004.21	0.707964	0.707843	0.680677	0.115658	6.12012	9.35076e-10	2.44437e-08	11.8996	11.9999	11.7693	12.5071	12.5981	12.6876
SPP1	23668	23909	0.707591	0.707598	0.689196	0.0928848	7.61802	2.57598e-14	1.49407e-12	14.1744	14.1555	14.1079	14.7119	14.8763	14.9725
ETV5	5114.83	5155.01	0.691608	0.691552	0.665119	0.105633	6.54673	5.881e-11	1.98457e-09	11.9098	11.8934	12.0262	12.5339	12.6451	12.7252
GBP1	1365.5	1375.31	0.681527	0.680758	0.600665	0.181047	3.76013	0.000169826	0.00159999	10.1009	9.92988	10.0764	10.5869	10.9941	10.5707
ABCB6	992.333	1000.97	0.675271	0.675078	0.59067	0.186445	3.6208	0.000293698	0.00257125	9.58158	9.76914	9.41177	10.2481	10.2834	10.2567
DFFA	8364.33	8445.52	0.669349	0.66925	0.64073	0.10999	6.08465	1.16747e-09	3.00947e-08	12.657	12.5727	12.7644	13.1101	13.4657	13.4265
DNAJB9	3742.5	3779.97	0.666852	0.666824	0.634457	0.119945	5.55943	2.7066e-08	5.12598e-07	11.4552	11.4589	11.6075	11.9631	12.2614	12.2977
NFAT5	3498.67	3523.17	0.665223	0.665108	0.63153	0.119109	5.58405	2.34985e-08	4.59086e-07	11.4581	11.4108	11.3625	12.0166	12.1877	12.0228
ANLN	6800.67	6896.31	0.659457	0.659246	0.623731	0.118439	5.56612	2.60481e-08	4.98448e-07	12.2327	12.6889	12.2018	12.8605	13.1043	13.137
KRT8	5641.83	5649	0.648416	0.649785	0.611035	0.128854	5.04281	4.58744e-07	7.0366e-06	12.1882	11.7766	12.2095	12.9104	12.0813	13.1278
TIRAP	2421.17	2428.27	0.638836	0.638997	0.590731	0.140929	4.53417	5.78316e-06	7.30173e-05	10.803	11.0254	10.8273	11.6805	11.5686	11.3231
PRKAG1	6153.33	6222.92	0.638459	0.638293	0.606851	0.113759	5.61094	2.0123e-08	4.01595e-07	12.1844	12.4575	12.0908	12.7631	12.9246	12.9604
PPID	10831.2	10955	0.636672	0.636697	0.615865	0.0927207	6.86683	6.56459e-12	2.53831e-10	12.9258	13.1867	13.0698	13.5051	13.783	13.8042
OAZ1	127589	128488	0.617005	0.616675	0.587998	0.107667	5.72763	1.01842e-08	2.2301e-07	16.6679	16.4048	16.7926	17.0247	17.369	17.3226
DUSP5	8787.83	8844.02	0.612347	0.612246	0.585976	0.10656	5.74558	9.1608e-09	2.07347e-07	12.8918	12.7035	12.7134	13.292	13.493	13.3607
BCOR	10404.3	10294.3	-0.619703	-0.61973	-0.595238	0.0977863	-6.33759	2.33385e-10	7.17891e-09	13.663	13.5698	13.5812	12.9909	13.1039	12.86
ABCG2	10009.5	9959.97	-0.620802	-0.620817	-0.595637	0.100904	-6.15255	7.62454e-10	2.05089e-08	13.481	13.7373	13.4473	12.863	12.9536	12.9867
TYMP	2268.5	2250.96	-0.63747	-0.637552	-0.592095	0.135272	-4.71312	2.43951e-06	3.3789e-05	11.4339	11.4853	11.3385	10.7351	10.804	10.8061
NFE2L3	6035.83	6020.51	-0.642286	-0.642094	-0.607002	0.119148	-5.38906	7.08277e-08	1.22856e-06	12.5397	13.11	12.8332	12.0269	12.183	12.3462
TERT	2143.33	2112.92	-0.644782	-0.645109	-0.592054	0.14613	-4.41464	1.0118e-05	0.000121941	11.4087	11.1431	11.4318	10.7091	10.7214	10.6187
MDM2	23499.8	23318.1	-0.645371	-0.645204	-0.615359	0.110025	-5.86415	4.51443e-09	1.04735e-07	14.9944	14.7778	14.5962	14.0238	14.2075	14.201
CCR1	23478.8	23378.9	-0.65823	-0.658144	-0.637068	0.0953154	-6.90491	5.02367e-12	2.02694e-10	14.5887	15.0265	14.7755	14.0229	14.1572	14.236
EIF5B	5842.67	5809.8	-0.662909	-0.662973	-0.635483	0.107109	-6.18972	6.02722e-10	1.721e-08	12.7452	13.0243	12.6022	12.1388	12.2149	12.0294
TNFAIP3	1875	1855.66	-0.683389	-0.683197	-0.631106	0.146711	-4.65676	3.21231e-06	4.32032e-05	11.198	11.1811	11.095	10.5285	10.3602	10.5353
MCM7	2897.67	2858.03	-0.691837	-0.691669	-0.654196	0.127069	-5.44328	5.23092e-08	9.24628e-07	11.7843	11.7156	11.8529	11.1945	11.0511	11.0317
TXNIP	15934.3	15819.9	-0.69381	-0.693792	-0.674155	0.0924833	-7.5018	6.29474e-14	3.33801e-12	14.1991	14.3981	14.1608	13.5325	13.5619	13.5821
SMAD3	4089.67	4067.57	-0.695799	-0.695961	-0.659855	0.124322	-5.59805	2.16776e-08	4.28017e-07	12.2753	12.4556	12.1449	11.4946	11.6021	11.6917
CXCR3	736.167	725.251	-0.697691	-0.698482	-0.592234	0.209871	-3.32814	0.000874264	0.00633796	10.1589	9.72101	9.48106	9.33851	9.07803	8.85133
CCND2	95746.7	94951.6	-0.713273	-0.713274	-0.698404	0.0836918	-8.52263	1.55971e-17	1.07216e-15	16.8585	16.8792	16.8027	16.0188	16.1699	16.2118
CDK9	1059.67	1047.1	-0.719687	-0.719365	-0.642598	0.179855	-3.99969	6.34257e-05	0.000657643	10.4417	10.4175	10.1644	9.81804	9.60209	9.44442
CD83	2568	2547.49	-0.736327	-0.736288	-0.697603	0.130101	-5.65936	1.51937e-08	3.06517e-07	11.4763	11.7818	11.6394	10.8473	10.9995	10.8417
SMAD7	1787.83	1766.89	-0.740252	-0.739901	-0.687393	0.150454	-4.91777	8.75337e-07	1.2997e-05	11.0761	11.1295	11.1193	10.4118	10.4851	10.2071
CACNG4	6804.33	6736.63	-0.741594	-0.741395	-0.716258	0.105955	-6.99727	2.60992e-12	1.10091e-10	12.9809	13.1059	13.0335	12.318	12.1927	12.3847
PRKCD	1697.83	1681.37	-0.745165	-0.745231	-0.692606	0.150374	-4.95584	7.20192e-07	1.08673e-05	11.0418	11.0487	11.0277	10.1956	10.4069	10.2803
IL10RA	2390.67	2366.88	-0.753873	-0.75374	-0.714382	0.131608	-5.72715	1.02133e-08	2.2301e-07	11.5253	11.624	11.4543	10.8091	10.8928	10.6401
PDGFB	1984.83	1970.13	-0.768044	-0.767666	-0.713274	0.15298	-5.01807	5.21933e-07	7.94023e-06	11.1818	11.4414	11.197	10.4854	10.4069	10.6238
TLR4	4898.33	4880.26	-0.768702	-0.76863	-0.736385	0.12167	-6.31736	2.66074e-10	7.96504e-09	12.2851	12.879	12.5522	11.6576	11.8444	11.9083
FGFR2	1750.33	1736.49	-0.777261	-0.77694	-0.706013	0.176217	-4.409	1.03847e-05	0.000124349	10.7984	11.3669	11.0932	10.4109	10.1997	10.3161
CYP2D6	572.833	566.734	-0.784935	-0.785367	-0.655598	0.23448	-3.3494	0.000809856	0.00594108	9.64885	9.51484	9.27504	8.71067	8.8196	8.55365
CALML3	5974.83	5896.96	-0.785388	-0.785523	-0.760608	0.104684	-7.50376	6.20121e-14	3.33801e-12	13.1621	12.9875	12.3263	12.4167	12.0885	11.6146
PIM2	4729.17	4665.92	-0.785532	-0.785637	-0.759625	0.107938	-7.27861	3.37268e-13	1.52675e-11	12.6325	12.4493	12.4972	11.7833	11.6873	11.7519
TNFRSF10B	3273.83	3255.83	-0.791229	-0.791051	-0.750944	0.132644	-5.96372	2.46556e-09	6.10144e-08	11.8318	12.2319	11.946	11.104	11.1864	11.3456
RUNX2	544	531.182	-0.800599	-0.798724	-0.6171	0.270228	-2.95574	0.00311922	0.0183786	9.37295	9.1903	9.55762	9.11612	8.2518	8.35116
CX3CR1	83786	82716.7	-0.829668	-0.829674	-0.818782	0.0776533	-10.6843	1.20498e-26	1.72033e-24	16.7062	16.6428	16.7255	15.8346	15.8579	15.8931
PIM1	1770	1748.99	-0.837281	-0.837444	-0.791381	0.147926	-5.66125	1.50272e-08	3.06489e-07	11.2456	11.1685	10.969	10.3671	10.262	10.2421
IRF8	1835.17	1818.62	-0.84414	-0.844445	-0.797976	0.149105	-5.66342	1.48387e-08	3.06007e-07	11.2704	11.3813	10.8837	10.4419	10.3802	10.1809
CDK5R1	764.667	758.689	-0.846728	-0.847108	-0.754128	0.209028	-4.05261	5.06497e-05	0.000537892	9.95314	10.1095	9.70737	9.06472	9.11506	9.05007
PER1	1169.17	1159.8	-0.864134	-0.864522	-0.796152	0.180249	-4.79626	1.61653e-06	2.27294e-05	10.5991	10.6806	10.35	9.60326	9.69721	9.73687
MX1	4866	4864.9	-0.871882	-0.871815	-0.843349	0.117984	-7.38925	1.47654e-13	6.85115e-12	12.1565	12.9412	12.6532	11.2454	11.8957	11.9942
BMF	1400	1387.14	-0.902133	-0.902053	-0.848075	0.16447	-5.4846	4.14416e-08	7.61541e-07	10.7669	11.0284	10.6435	9.9827	9.94987	9.79977
MAP2K6	557.833	546.855	-0.911316	-0.905517	-0.709214	0.29046	-3.11753	0.00182375	0.0117124	9.27371	9.48527	9.6037	8.99583	8.67067	7.96223
HEYL	280.167	275.986	-0.926887	-0.925932	-0.676616	0.325935	-2.84085	0.00449934	0.0242755	8.57627	8.56012	8.33696	7.82982	7.52164	7.34124
CAV2	1625.5	1614.16	-0.963282	-0.962817	-0.907909	0.168956	-5.69861	1.20786e-08	2.57677e-07	10.8946	11.2637	10.9929	9.95339	9.99183	10.3161
CXCL12	4653.5	4593.01	-0.996771	-0.996757	-0.97448	0.111992	-8.90024	5.57253e-19	4.30942e-17	12.6156	12.6026	12.517	11.5821	11.5115	11.6512
CCND1	9153.17	9085.81	-0.998692	-0.998863	-0.974671	0.115237	-8.6679	4.40174e-18	3.26785e-16	13.5086	13.7047	13.4593	12.323	12.5844	12.7691
SPRY1	753.833	748.679	-1.03228	-1.03089	-0.93538	0.223401	-4.61451	3.94017e-06	5.22354e-05	9.71635	10.0516	10.0824	8.50569	8.81269	9.43513
PRDM1	5411.17	5358.73	-1.03429	-1.03431	-1.0099	0.115532	-8.95262	3.47157e-19	2.8014e-17	12.7864	13.0012	12.639	11.7688	11.7642	11.7907
TNFRSF21	2736.83	2711.84	-1.03489	-1.03474	-0.999557	0.138968	-7.44585	9.63189e-14	4.70442e-12	11.7426	12.0313	11.7046	10.7538	10.748	10.8721
OAS1	492	486.903	-1.05612	-1.05535	-0.934184	0.254218	-4.15136	3.30507e-05	0.000362971	9.20659	9.36979	9.47557	7.9317	8.40687	8.54504
SLC45A3	344	341.931	-1.06274	-1.05142	-0.727759	0.370075	-2.84109	0.0044959	0.0242755	8.76225	9.03859	8.62205	7.82394	6.98261	8.42812
MYLIP	5077.17	5010.71	-1.06518	-1.06523	-1.04143	0.116987	-9.10559	8.5798e-20	7.58291e-18	12.8188	12.7872	12.5652	11.7059	11.5562	11.7135
KIF3A	2764.5	2747.97	-1.09842	-1.09856	-1.06504	0.130872	-8.39414	4.6933e-17	3.00372e-15	11.582	12.1599	11.8219	10.5103	10.9034	10.8548
NKX2-5	248.5	243.201	-1.19812	-1.19402	-0.916999	0.377148	-3.16591	0.001546	0.0102113	8.40324	8.50224	8.20148	7.89293	6.98261	6.63706
APOL3	972.167	954.043	-1.28468	-1.28296	-1.2196	0.202491	-6.33591	2.35945e-10	7.17891e-09	10.3719	10.4789	10.3309	9.43033	9.1066	8.79069
CXCL10	735.167	734.033	-1.41467	-1.41136	-1.30873	0.263004	-5.36631	8.03631e-08	1.36839e-06	9.59038	10.6926	9.69796	8.61522	8.52164	8.60012
WNT10A	530.5	519.728	-1.55872	-1.55654	-1.47417	0.25229	-6.16966	6.84351e-10	1.89575e-08	9.75757	9.59416	9.40793	8.21373	8.28217	7.5876
TMPRSS2	484.833	476.276	-1.71629	-1.71485	-1.63753	0.255856	-6.7024	2.05024e-11	7.46126e-10	9.60609	9.68802	9.18586	8.04717	7.91315	7.37078
IGFBP3	39643.8	38617.4	-2.58049	-2.58048	-2.57641	0.0872133	-29.5881	2.12614e-192	1.97306e-189	15.9885	16.0352	16.016	13.3578	13.3542	13.5862
LFC, Log2 fold-change; MLE, maximum likelihood estimates for the log2 fold-change; lfcSE, Log2 fold-change standard error; FDR, false discovery rate; NC, normalized counts.
